# Supplementary material for: SLIMarray: Lightweight software for microarray facility management
Source: PubMed Central journal article supplement (PMC1636632; doi:10.1186/1751-0473-1-5), 2006-10-26
Supplement: 1751-0473-1-5-S2.pdf [file 1751-0473-1-5-S2.pdf]

# **SLIMarray**

## Facility Staff Guide

by Pamela Troisch  
September 7, 2006

## Table of Contents

|     |                                                |    |
|-----|------------------------------------------------|----|
| 1   | Access SLIMarray as a Facility Staff User..... | 3  |
| 1.1 | Description.....                               | 3  |
| 1.2 | Login.....                                     | 3  |
| 2   | Track Arrays.....                              | 3  |
| 2.1 | Chip Inventory.....                            | 3  |
| 2.2 | Inventory Checks.....                          | 5  |
| 2.3 | Creating and Editing Chip Types.....           | 6  |
| 3   | Samples.....                                   | 7  |
| 3.1 | Entering Samples to be Hybridized.....         | 7  |
| 4   | Hybridizations.....                            | 8  |
| 4.1 | Selecting Samples to be Hybridized.....        | 8  |
| 5   | Charges.....                                   | 10 |
| 5.1 | Charge Templates.....                          | 10 |
| 5.2 | Charge Periods.....                            | 11 |
| 5.3 | Charge Sets.....                               | 11 |
| 6   | Lab Groups.....                                | 13 |
| 6.1 | Creating and Changing lab groups.....          | 13 |
| 7   | Exit SLIMarray.....                            | 13 |
| 7.1 | Log out.....                                   | 13 |

# 1 Access SLIMarray as a Facility Staff User

## 1.1 Description

SLIMarray users with Facility Staff permissions have access to daily workflow tasks such as checking chip inventories, entering hybridizations, and monitoring charges. A Facility Staff user is, however, unable to perform administration functions such as manipulating users and changing the SLIMarray configuration.

## 1.2 Login

Login with your username and password as set up by your SLIMarray administrator. This will open the home page (see Figure 1).

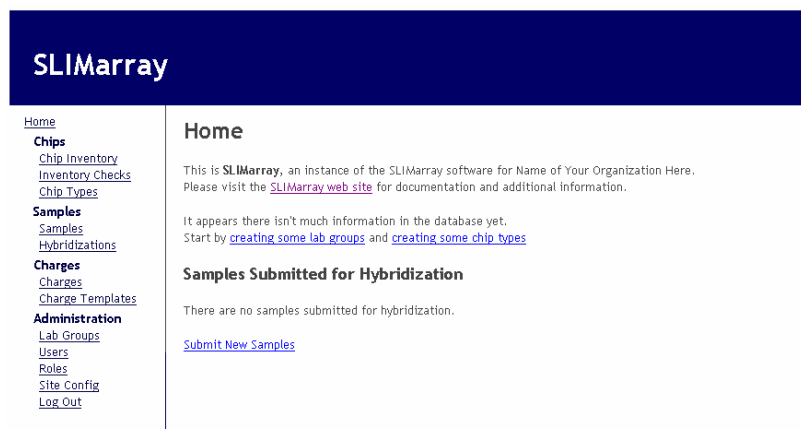

Figure 1 - Successful Login

If this is the first time logging in, the home page will prompt you to begin by entering lab groups and chip types.

Click on **creating some lab groups**; this will allow you to enter the name of a lab group. When finished click on the **Create** button and repeat for the remaining lab groups. Click on **creating some chip types** and fill in the requested fields with the name of the chip type, a short name (if it is an Affy array use the abbreviated name provided by Affymetrix), and enter the organism. When finished hit the **Create** button.

# 2 Track Arrays

## 2.1 Chip Inventory

Click on **Chip Inventory** under the **Chips** heading; a list of lab groups will appear in a column with the chip types listed for each lab group (see Figure 2).

## Chip Inventory

[New Chip Transaction](#)

Fauna: [Jumping Frog](#), [0 Spitting Llama](#)

Flora: [Blue Seaweed](#), [Purple Pickle](#)

Pink: [Pink Pigeon](#)

### Figure 2 - Chip Inventory

Locate an individual lab group and select the chip type to track (see Figure 3).

#### Listing Chip Transactions for Flora and Purple Pickle

[Chip Inventory Home](#) [New chip\\_transaction](#) [Enter an Inventory Check](#)

##### Totals

| Acquired | Used | Traded or Sold | Borrowed(In) | Returned(Out) | Borrowed(Out) | Returned(In) | Current Number of Chips |
|----------|------|----------------|--------------|---------------|---------------|--------------|-------------------------|
| 15       | 8    | 0              | 0            | 0             | 0             | 0            | 7                       |

##### Individual Transactions

| Date       | Description                      | Acquired | Used | Traded<br>sold | Borrowed<br>in | Returned<br>out | Borrowed<br>out | Returned<br>in | Edit                 | Destroy                 |
|------------|----------------------------------|----------|------|----------------|----------------|-----------------|-----------------|----------------|----------------------|-------------------------|
| 2006-06-14 | Box of 15 received<br>06/13/2006 | 15       |      |                |                |                 |                 |                | <a href="#">Edit</a> | <a href="#">Destroy</a> |
| 2006-06-14 | Hybridized on<br>2006-06-14      |          | 8    |                |                |                 |                 |                | <a href="#">Edit</a> | <a href="#">Destroy</a> |

### Figure - 3 Tracking a Chip Inventory

A summary table of **Totals** lists the chips that have been acquired, used, traded, borrowed and returned, and the current number of chips that are available for hybridizations. A comprehensive table itemizing **Individual Transactions** is displayed under the summary table; it shows the date when a transaction occurred, the description of the transaction, the number of chips that have been acquired, used, or otherwise deployed.

To enter a transaction click on **New Chip Transaction** and fill in the appropriate fields to record the type of transaction (see Figure 4).

#### New Chip Transaction

| Date         | Lab Group | Chip Type     | Description   | Acquired | Used | Traded/<br>Sold | Borrowed<br>from<br>another<br>group | Returned to<br>another<br>group | Borrowed<br>from<br>this group | Returned<br>to<br>this group |
|--------------|-----------|---------------|---------------|----------|------|-----------------|--------------------------------------|---------------------------------|--------------------------------|------------------------------|
| 2006<br>7 12 | Flora     | Purple Pickle | Pink borrowed |          |      |                 |                                      |                                 | 3                              |                              |

[Back to Listing](#)

### Figure 4 - Entering a New Chip Transaction

Hit the **Create** button when complete; the new transaction will be accounted for in both tables (see Figure 5).

ChipTransaction was successfully created.

### Listing Chip Transactions for Flora and Purple Pickle

[Chip Inventory Home](#) [New chip\\_transaction](#) [Enter an Inventory Check](#)

#### Totals

| Acquired | Used | Traded or Sold | Borrowed(In) | Returned(Out) | Borrowed(Out) | Returned(In) | Current Number of Chips |
|----------|------|----------------|--------------|---------------|---------------|--------------|-------------------------|
| 15       | 8    | 0              | 0            | 0             | 3             | 0            | 4                       |

#### Individual Transactions

| Date       | Description                   | Acquired | Used | Traded sold | Borrowed in | Returned out | Borrowed out | Returned in | Edit                 | Destroy                 |
|------------|-------------------------------|----------|------|-------------|-------------|--------------|--------------|-------------|----------------------|-------------------------|
| 2006-07-12 | Pink borrowed                 |          |      |             |             |              | 3            |             | <a href="#">Edit</a> | <a href="#">Destroy</a> |
| 2006-06-14 | Box of 15 received 06/13/2006 | 15       |      |             |             |              |              |             | <a href="#">Edit</a> | <a href="#">Destroy</a> |
| 2006-06-14 | Hybridized on 2006-06-14      |          | 8    |             |             |              |              |             | <a href="#">Edit</a> | <a href="#">Destroy</a> |

Figure 5 - A Successful Chip Transaction

## 2.2 Inventory Checks

Inventory checks consist of physically counting the number of all the different types of arrays available for each group.

To enter a new inventory check click **Inventory Checks** and then **New Inventory Check**, or in **Chip Inventory** click **Enter an Inventory Check** (see Figure 6).

#### New Inventory Check

Date  
2006 | July | 11

Lab Group  
Fauna

Chip Type  
Blue Seaweed

Number expected  
39

Number counted  
39

[Back](#) | [Chip Accounting Home](#)

Figure - 6 Entering a New Inventory Check

Select the lab group and the chip type, and adjust the date to the day the chips were counted. In the **Number Expected** field enter the number of chips listed in **Chip Inventory** under **Current Number of Chips** in the **Totals** table and compare with the number entered into the field **Number Counted**. Click the **Create** button and a list of inventory checks will be displayed including the most recently entered one (see Figure 7).

InventoryCheck was successfully created.

### Listing Inventory Check

| Date       | Lab Group | Chip Type     | Number Expected | Number Counted | Edit                 | Destroy                 |
|------------|-----------|---------------|-----------------|----------------|----------------------|-------------------------|
| 2006-07-11 | Flora     | Purple Pickle | 7               | 7              | <a href="#">Edit</a> | <a href="#">Destroy</a> |
| 2006-07-11 | Fauna     | Blue Seaweed  | 39              | 39             | <a href="#">Edit</a> | <a href="#">Destroy</a> |

[Chip Accounting Home](#) | [New inventory\\_check](#)

Figure 7 - A Successful Inventory Check

The chip numbers should match, if not examine the individual transactions and investigate the discrepancy. The inventory check can be edited once the discrepancy is resolved by using the **Edit** link. To delete a record click the **Destroy** link.

## 2.3 Creating and Editing Chip Types

Click on **Chip Types** and a list of previously entered chips will be displayed (see Figure 8).

Listing Chip Types

| Name             | Short name | Edit                 | Destroy                 |
|------------------|------------|----------------------|-------------------------|
| Blue Seaweed     | Blue       | <a href="#">Edit</a> | <a href="#">Destroy</a> |
| Jumping Frog 6.0 | Frog 6.0   | <a href="#">Edit</a> | <a href="#">Destroy</a> |
| Pink Pigeon      | Pigeon     | <a href="#">Edit</a> | <a href="#">Destroy</a> |
| Purple Pickle    | Pickle     | <a href="#">Edit</a> | <a href="#">Destroy</a> |
| Spitting Llama   | Llama      | <a href="#">Edit</a> | <a href="#">Destroy</a> |

[New chip\\_type](#)

Figure 8 - A List of Chip Types

To add a new type of chip click on **New chip\_type** at the bottom of the list (see Figure 9).

### New Chip Type

Name

Short name

Organism  
 If Other, name the organism:

[Back](#)

Figure 9 - Entering a New Chip Type

Enter the name of the chip and a short name to identify the chip, and then choose the organism from the drop down menu (if it is not present enter it in the field provided). Note: If using the Affymetrix system the short name should refer to the short name provided by Affymetrix.

When done click the **Create** button; the list of chip types will re-appear with the new chip included (see Figure 10).

ChipType was successfully created.

Listing Chip Types

| Name             | Short name | Edit                 | Destroy                 |
|------------------|------------|----------------------|-------------------------|
| Blue Seaweed     | Blue       | <a href="#">Edit</a> | <a href="#">Destroy</a> |
| Green Mouse 2.0  | Green 2.0  | <a href="#">Edit</a> | <a href="#">Destroy</a> |
| Jumping Frog 6.0 | Frog 6.0   | <a href="#">Edit</a> | <a href="#">Destroy</a> |
| Pink Pigeon      | Pigeon     | <a href="#">Edit</a> | <a href="#">Destroy</a> |
| Purple Pickle    | Pickle     | <a href="#">Edit</a> | <a href="#">Destroy</a> |
| Spitting Llama   | Llama      | <a href="#">Edit</a> | <a href="#">Destroy</a> |

[New chip\\_type](#)

Figure 10 - A Successful Chip Type Addition

To edit a chip type click on **Edit**; this will allow you to change the **Name**, **Short name** and the **Organism**, similar to entering a new chip type.

To remove a chip type click **Destroy**. A new window will pop up listing the hybridizations, inventory checks, and chip transactions related to the chip type and prompting you to confirm or abandon your decision (see Figure 11).

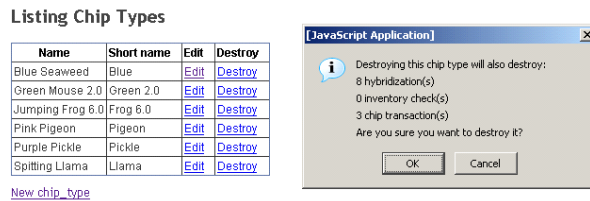

**Figure 11 - Warning Before Selecting to Destroy a Chip Type**

## 3 Samples

### 3.1 Entering Samples to be Hybridized

Under the heading **Samples**, click **Samples**. A list of samples submitted for hybridization will be displayed. Click on **Submit New Samples** at the top of the table. Fill in the fields provided with the sample information (see Figure 12).

The image shows a web form titled "Enter Samples". It contains the following fields: "Date Samples will be submitted" with a date picker set to 2006, August, 28; "Number of Samples" with a text input field containing the number 1; "Lab Group" with a dropdown menu set to "Flora" and a link "Add Lab Group"; "Chip Type" with a dropdown menu set to "Blue Seaweed" and a link "Add Chip Type"; and an "Add to Sample Table" button. Below the form is a link "Back to List".

**Figure 12 - Submitting Samples for Hybridization**

The fields of information requested are dependant on the site configurations determined by the administrator. Click on the **Add to Sample Table** button when completed. Repeat with remaining batches of samples.

Do not start filling out the **Sample Table** until all the samples to be submitted have been added to the table.

After the **Add to Sample Table** button is clicked information on each sample will be requested (see Figure 13). Sample names cannot have characters in them, such as + or /, or spaces, instead use a dash or an underscore. If samples are entered incorrectly an error message will pop up prompting you to make appropriate corrections.

**Enter Samples**

Date Samples will be submitted  
 2006 August 28

Number of Samples  
 6

Lab Group  
 Flora (Add Lab Group)

Chip Type  
 Blue Seaweed (Add Chip Type)

Add to Sample Table

Wait until you've finished adding samples to this table before entering the sample names.

| Date       | Short Name | Full Sample Name | Sample Group Name | Organism | Lab Group | Chip Type    |
|------------|------------|------------------|-------------------|----------|-----------|--------------|
| 2006-08-28 | Blue_4     | Blue_Seaweed_4   | Blue              | Seaweed  | Flora     | Blue Seaweed |
| 2006-08-28 | Blue_5     | Blue_Seaweed_5   | Blue              | Seaweed  | Flora     | Blue Seaweed |
| 2006-08-28 | Blue_6     | Blue_Seaweed_6   | Blue              | Seaweed  | Flora     | Blue Seaweed |

Create Sample Records

[Clear Samples](#) | [Back to List of Samples](#)

**Figure 13 - Sample Information to be Entered**

Once entered, the samples will appear on the home page in a table under the heading **Samples Submitted for Hybridization** (see Figure 14).

**Home**

This is SLIMarray, an instance of the SLIMarray software for Name of Your Organization Here. Please visit the [SLIMarray web site](#) for documentation and additional information.

**Samples Submitted for Hybridization**

| Date       | Short Sample Name | Sample Name    | Sample Group Name | Status    | Edit                 | Destroy                 |
|------------|-------------------|----------------|-------------------|-----------|----------------------|-------------------------|
| 2006-08-28 | Blue_4            | Blue_Seaweed_4 | Blue              | submitted | <a href="#">Edit</a> | <a href="#">Destroy</a> |
| 2006-08-28 | Blue_5            | Blue_Seaweed_5 | Blue              | submitted | <a href="#">Edit</a> | <a href="#">Destroy</a> |
| 2006-08-28 | Blue_6            | Blue_Seaweed_6 | Blue              | submitted | <a href="#">Edit</a> | <a href="#">Destroy</a> |

[Hybridize Samples](#)

**Figure - 14 Samples Submitted for Hybridization Displayed on the Home Page**

## 4 Hybridizations

### 4.1 Selecting Samples to be Hybridized

Under the header **Samples** click on **Hybridizations**, a list of all previous hybs will be displayed, with the most recent ones at the beginning (see Figure 15).

**Hybridizations**

[New Hybridizations](#)

| Date       | Chip number | Short sample name | Sample name     | Sample group name | Seams user | Seams project          | Array platform | Edit                 | Destroy                 |
|------------|-------------|-------------------|-----------------|-------------------|------------|------------------------|----------------|----------------------|-------------------------|
| 2006-07-15 | 1           | GM_X              | Green_Mouse_X   | X                 |            |                        | nonafly        | <a href="#">Edit</a> | <a href="#">Destroy</a> |
| 2006-07-15 | 2           | GM_Y              | Green_Mouse_Y   | Y                 |            |                        | nonafly        | <a href="#">Edit</a> | <a href="#">Destroy</a> |
| 2006-07-13 | 1           | sea_1             | blue_seaweed_1A | 1A                |            |                        | affy           | <a href="#">Edit</a> | <a href="#">Destroy</a> |
| 2006-07-13 | 2           | sea_2             | blue_seaweed_2A | 2A                |            |                        | affy           | <a href="#">Edit</a> | <a href="#">Destroy</a> |
| 2006-07-13 | 3           | sea_3             | blue_seaweed_3A | 3A                |            |                        | affy           | <a href="#">Edit</a> | <a href="#">Destroy</a> |
| 2006-07-13 | 4           | sea_4             | blue_seaweed_1B | 1B                |            |                        | affy           | <a href="#">Edit</a> | <a href="#">Destroy</a> |
| 2006-07-13 | 5           | sea_5             | blue_seaweed_2B | 2B                |            |                        | affy           | <a href="#">Edit</a> | <a href="#">Destroy</a> |
| 2006-07-13 | 6           | sea_6             | blue_seaweed_3B | 3B                |            |                        | affy           | <a href="#">Edit</a> | <a href="#">Destroy</a> |
| 2006-06-16 | 1           | if_1              | jump_1          | jump              | jpfrog     | Jumping Frog Study     | affy           | <a href="#">Edit</a> | <a href="#">Destroy</a> |
| 2006-06-15 | 1           | A                 | pink_1          | pink              | ppigeon    | Pink Phenotype         | affy           | <a href="#">Edit</a> | <a href="#">Destroy</a> |
| 2006-06-15 | 2           | B                 | pink_2          | p                 | ppigeon    | Pink Phenotype         | affy           | <a href="#">Edit</a> | <a href="#">Destroy</a> |
| 2006-06-14 | 1           |                   | purple_1A       | purple            | ppickle    | Pickle Gene Expression | affy           | <a href="#">Edit</a> | <a href="#">Destroy</a> |
| 2006-06-14 | 2           |                   | purple_2B       | purple            | ppickle    | Pickle Gene Expression | affy           | <a href="#">Edit</a> | <a href="#">Destroy</a> |
| 2006-06-14 | 3           |                   | purple_3C       | purple            | ppickle    | Pickle Gene Expression | affy           | <a href="#">Edit</a> | <a href="#">Destroy</a> |
| 2006-06-14 | 4           |                   | purple_4D       | purple            | ppickle    | Pickle Gene Expression | affy           | <a href="#">Edit</a> | <a href="#">Destroy</a> |
| 2006-06-14 | 5           |                   | purple_5E       | purple            | ppickle    | Pickle Gene Expression | affy           | <a href="#">Edit</a> | <a href="#">Destroy</a> |
| 2006-06-14 | 6           |                   | purple_6F       | purple            | ppickle    | Pickle Gene Expression | affy           | <a href="#">Edit</a> | <a href="#">Destroy</a> |
| 2006-06-14 | 7           |                   | purple_7G       | purple            | ppickle    | Pickle Gene Expression | affy           | <a href="#">Edit</a> | <a href="#">Destroy</a> |
| 2006-06-14 | 8           |                   | purple_8H       | purple            | ppickle    | Pickle Gene Expression | affy           | <a href="#">Edit</a> | <a href="#">Destroy</a> |

**Figure - 15 An Up-to-date List of Hybridizations Performed**



Click on **New Hybridizations**, or on the home page click **Hybridizations** at the bottom of the table of samples submitted for hybridizations. Select the individual samples to be hybridized (see Figure 16).

Enter Hybridizations

Submitted Samples

| Select                              | Date Submitted | Short Sample Name | Sample Name    | Sample Group Name | Edit                 | Destroy                 |
|-------------------------------------|----------------|-------------------|----------------|-------------------|----------------------|-------------------------|
| <input checked="" type="checkbox"/> | 2006-08-28     | Blue_4            | Blue_Seaweed_4 | Blue              | <a href="#">Edit</a> | <a href="#">Destroy</a> |
| <input checked="" type="checkbox"/> | 2006-08-28     | Blue_5            | Blue_Seaweed_5 | Blue              | <a href="#">Edit</a> | <a href="#">Destroy</a> |
| <input type="checkbox"/>            | 2006-08-28     | Blue_6            | Blue_Seaweed_6 | Blue              | <a href="#">Edit</a> | <a href="#">Destroy</a> |

Hybridization Date  
 2006 | August | 28

Charge Set

Charge Template

[Back to List](#)

**Figure - 16 Select Samples to be Hybridized**

Enter the **Hybridization Date**, select a **Charge Set** and a **Charge Template**. Click on the **Add Samples to the Hybridization Table** button. The samples will now be listed under **Hybridizations**.

By clicking and dragging a sample within the list will rearrange the order, changing the chip number listed after the date associated with the sample depending on the position in the list (see Figure 17).

Hit the **Create Hybridization Records** button when complete.

Enter Hybridizations

Submitted Samples

| Select                   | Date Submitted | Short Sample Name | Sample Name    | Sample Group Name | Edit                 | Destroy                 |
|--------------------------|----------------|-------------------|----------------|-------------------|----------------------|-------------------------|
| <input type="checkbox"/> | 2006-08-28     | Blue_6            | Blue_Seaweed_6 | Blue              | <a href="#">Edit</a> | <a href="#">Destroy</a> |

Hybridization Date  
 2006 | August | 28

Charge Set

Charge Template

**Hybridizations**

Drag and drop hybridizations to rearrange their order:

[Clear Hybridizations](#) | [Back to List of Hybridizations](#)

**Figure - 17 A list of Planned Hybridizations**

A printable table of current hybridizations will be displayed (see Figure 18).

Hybridizations were successfully created.

#### Hybridizations Recorded:

| Date       | Chip Number | Short Name | Full Sample Name | Lab Group | Chip Type    |
|------------|-------------|------------|------------------|-----------|--------------|
| 2006-07-13 | 1           | sea_1      | blue_seaweed_1A  | Fauna     | Blue Seaweed |
| 2006-07-13 | 2           | sea_2      | blue_seaweed_2A  | Fauna     | Blue Seaweed |
| 2006-07-13 | 3           | sea_3      | blue_seaweed_3A  | Fauna     | Blue Seaweed |
| 2006-07-13 | 4           | sea_4      | blue_seaweed_1B  | Fauna     | Blue Seaweed |
| 2006-07-13 | 5           | sea_5      | blue_seaweed_2B  | Fauna     | Blue Seaweed |
| 2006-07-13 | 6           | sea_6      | blue_seaweed_3B  | Fauna     | Blue Seaweed |

[Hybridization List](#)

Figure - 18 Printable Hybridization Record

## 5 Charges

### 5.1 Charge Templates

Click on **Charge Templates** in the menu to associate charges with frequently performed tasks, such as hybridizations, quality control and labeling.

A list of current templates will be displayed (see Figure 19).

#### Listing Charge Templates

| Name                       | Description                | Chips used | Chip cost | Labeling cost | Hybridization cost | Qc cost | Other cost | Edit                 | Destroy                 |
|----------------------------|----------------------------|------------|-----------|---------------|--------------------|---------|------------|----------------------|-------------------------|
| Bioanalyzer                | Bioanalyzer                | 1          | 5.0       | 0.0           | 0.0                | 0.0     | 0.0        | <a href="#">Edit</a> | <a href="#">Destroy</a> |
| Hyb                        | Hyb                        | 1          | 4.5       | 0.0           | 3.0                | 0.0     | 0.0        | <a href="#">Edit</a> | <a href="#">Destroy</a> |
| One Cycle Labeling and Hyb | One Cycle Labeling and Hyb | 1          | 4.5       | 1.25          | 2.0                | 0.0     | 0.0        | <a href="#">Edit</a> | <a href="#">Destroy</a> |
| Two Cycle Labeling and Hyb | Two Cycle Labeling and Hyb | 1          | 4.5       | 3.0           | 3.0                | 0.0     | 0.0        | <a href="#">Edit</a> | <a href="#">Destroy</a> |

[New charge\\_template](#)

Figure - 19 Current Charge Templates

To create a new template click on **New charge\_template** and fill out the given fields then click **Create** (see Figure 20).

The **Name** identifies the template, the **Chips Used** refers to the number of chips to be charged for a particular template (if any), the **Default Description** is a short explanation of what the charges involve, and the **Chip cost** is the cost per chip listed under **Chips Used**. If a sample requires labeling the cost of that is listed under **Labeling cost**. If the sample is to be hybridized the cost of that will be listed under **Hybridization cost**. If the sample underwent QC, for example if the RNA, cRNA and/or fragmented cRNA were run on a Bioanalyzer, the cost would be listed under **Qc cost**. **Other cost** tallies all the other costs involved.

### New Charge Template

Name

Chips Used

Default Description

Chip cost

Labeling cost

Hybridization cost

QC cost

Other cost

[Back](#)

Figure - 20 Entering a New Charge Template

## 5.2 Charge Periods

Click on **Charges** and a list of all charge sets will be displayed, separated into charge periods (see Figure 21). A charge period includes all charges accumulated over a determined amount of time (usually a billing cycle).

### Listing All Charge Sets

[New Charge Period](#)

June 13th, 2006 ( [PDF Report](#) [Excel Report](#) [Edit](#) [Destroy](#) )

[New Charge Set](#)

| Charge Set Name | Lab Group | Budget / PO # | Chips | Chip Cost | Labeling Cost | Hyb Cost | QC Cost | Other Cost | Total   | View Charges                 | Add Charge                 | Edit Set Info                 | Destroy Set                 |
|-----------------|-----------|---------------|-------|-----------|---------------|----------|---------|------------|---------|------------------------------|----------------------------|-------------------------------|-----------------------------|
| Pigeon          | Bird      | 0512345       | 2     | \$9.50    | \$1.25        | \$3.00   | \$0.00  | \$0.00     | \$13.75 | <a href="#">View Charges</a> | <a href="#">Add Charge</a> | <a href="#">Edit Set Info</a> | <a href="#">Destroy Set</a> |
| Seaweed         | Flora     | 123456        | 3     | \$14.00   | \$0.00        | \$6.00   | \$0.00  | \$0.00     | \$20.00 | <a href="#">View Charges</a> | <a href="#">Add Charge</a> | <a href="#">Edit Set Info</a> | <a href="#">Destroy Set</a> |

July 11th, 2006 ( [PDF Report](#) [Excel Report](#) [Edit](#) [Destroy](#) )

[New Charge Set](#)

| Charge Set Name | Lab Group | Budget / PO # | Chips | Chip Cost | Labeling Cost | Hyb Cost | QC Cost | Other Cost | Total   | View Charges                 | Add Charge                 | Edit Set Info                 | Destroy Set                 |
|-----------------|-----------|---------------|-------|-----------|---------------|----------|---------|------------|---------|------------------------------|----------------------------|-------------------------------|-----------------------------|
| Pigeon          | Bird      | 5123456       | 2     | \$9.50    | \$0.00        | \$3.00   | \$0.00  | \$0.00     | \$12.50 | <a href="#">View Charges</a> | <a href="#">Add Charge</a> | <a href="#">Edit Set Info</a> | <a href="#">Destroy Set</a> |

Figure - 21 A Display of Charges Divided into Charge Periods, Subdivided into Charge Sets

A new charge period can be generated by clicking on **New Charge Period**. Name the charge period and click **Create** (see Figure 22).

### New Charge Period

Name

[Back](#)

Figure - 22 Entering a New Charge Period

## 5.3 Charge Sets

Within each charge period are charge sets; charges divided into groups, each typically associated with a different lab group (see Figure 21). To list the charges

within a particular charge set click **View Charges**; a list of individual charges that a particular lab group has incurred will be displayed (see Figure 23).

Charge was successfully created.

#### Listing Charges for Pigeon

| Select                   | Date       | Description | Chips Used | Chip Cost | Labeling Cost | Hybridization Cost | QC Cost | Other Cost | Edit                 | Destroy                 |
|--------------------------|------------|-------------|------------|-----------|---------------|--------------------|---------|------------|----------------------|-------------------------|
| <input type="checkbox"/> | 2006-06-28 | Bioanalyzer | 1          | \$5.00    | \$0.00        | \$0.00             | \$0.00  | \$0.00     | <a href="#">Edit</a> | <a href="#">Destroy</a> |
| <input type="checkbox"/> | 2006-06-28 | Hyb         | 1          | \$4.50    | \$0.00        | \$3.00             | \$0.00  | \$0.00     | <a href="#">Edit</a> | <a href="#">Destroy</a> |

June 13th, 2006 - Pigeon

[Back to Charge Sets](#) | [New charge](#)

**Figure - 23 Individual Charges in a Charge Set**

There is an option to move individual charges into another charge set located in a different charge period. To move individual charges from one charge set to another, check the individual charges to be transferred and select the charge set to transfer them to from the drop down menu at the bottom of the table, then click **Move Charges To This Charge Set**. There is also an option to **Edit** and **Destroy** an individual charge.

To add a charge click on **New charge** and select an existing charge template from the drop down menu or fill out the fields, which are similar to those encountered when setting up a charge template. (see Figure 24).

**New Charge**

Bioanalyzer

Fauna - Flora

Date: 2006 July 28

Chips Used: 0

Description:

Chip cost: 0

Labeling cost: 0

Hybridization cost: 0

QC cost: 0

Other cost: 0

[Back](#)

**Figure - 24 Adding a New Charge**

To get back to the listing of charge sets click on **Back to Charge Sets**. To add a new charge set click on **New Charge Set** (see Figure 25).

**New Charge Set**

Lab Group

Charge Period  
 [\(Add Charge Period\)](#)

Name

Charge Method  
 Internal Budget Number  
 External PO Number

Budget / PO

Budget manager (if charge is Internal)

**Figure - 25 Entering a New Charge Set**

Select the lab group and charge period from the down menus. Enter a name for the charge set under **Name**, select the **Charge Method** and enter the Budget/PO number. When complete click **Create**.

## 6 Lab Groups

### 6.1 Creating and Changing lab groups

Click on **Lab Groups** to view a current list of lab groups (see Figure 26).

#### Listing Lab Groups

| Name  | Edit                 | Destroy                 |
|-------|----------------------|-------------------------|
| Fauna | <a href="#">Edit</a> | <a href="#">Destroy</a> |
| Flora | <a href="#">Edit</a> | <a href="#">Destroy</a> |
| Pink  | <a href="#">Edit</a> | <a href="#">Destroy</a> |

[New lab\\_group](#)

**Figure - 26 Current Lab Groups**

To change a lab group, click on **Edit** and make corrections. To delete a lab group click on **Destroy**. To add a new lab group, click on **New lab\_group**; type the name of the lab group and click on the 'Create' button (see Figure 27).

**New Lab Group**

Name

[Back](#)

**Figure - 27 Entering a New Lab Group**

## 7 Exit SLIMarray

### 7.1 Log out

Click **Log Out** to exit SLIMarray and return to the login page.
