# Supplementary material for: SLIMarray: Lightweight software for microarray facility management
Source: PubMed Central journal article supplement (PMC1636632; doi:10.1186/1751-0473-1-5), 2006-10-26
Supplement: 1751-0473-1-5-S3.pdf [file 1751-0473-1-5-S3.pdf]

# **SLIMarray** Customer Guide

by Pamela Troisch  
September 7, 2006

## Table of Contents

|     |                                           |   |
|-----|-------------------------------------------|---|
| 1   | Access SLIMarray as a Customer User ..... | 3 |
| 1.1 | Description .....                         | 3 |
| 1.2 | Login .....                               | 3 |
| 2   | Chips .....                               | 3 |
| 2.1 | Chip Inventory .....                      | 3 |
| 3   | Samples .....                             | 4 |
| 3.1 | Status of Submitted Samples .....         | 4 |
| 3.2 | Submitting New Samples.....               | 4 |
| 4   | Exit SLIMarray .....                      | 5 |
| 4.1 | Log out .....                             | 5 |

# 1 Access SLIMarray as a Customer User

## 1.1 Description

SLIMarray users with Customer permissions have access to view their Lab Group's chip inventory and the ability to enter samples for hybridization.

## 1.2 Login

Login with your username and password as set up by your SLIMarray administrator. This will open the home page (see Figure 1). The home page will display a table of samples that have been entered for future hybridization under **Samples Submitted for Hybridization**. Under the title **Array Inventories** the type of chips available to your group are listed alongside the number of chips for each type on hand.

The screenshot shows the SLIMarray web interface. At the top is a dark blue header with the text "SLIMarray". Below the header is a navigation menu with links for Home, Chips, Chip Inventory, Samples, Samples, Administration, and Log Out. The main content area is titled "Home" and contains a message: "This is SLIMarray, an instance of the SLIMarray software for Name of Your Organization Here. Please visit the [SLIMarray web site](#) for documentation and additional information." Below this is a section titled "Samples Submitted for Hybridization" which contains a table with columns: Date, Short Sample Name, Sample Name, Sample Group Name, Status, Edit, and Destroy. The table lists three samples: 2006-09-05 B-4, 2006-09-05 B-5, and 2006-09-05 B-6, all with a status of "submitted". Below the table is a link "Submit New Samples". Underneath is a section titled "Array Inventories" with the heading "Flora:" and a list item "Blue Seaweed: -9".

Figure 1 - Successful Login

# 2 Chips

## 2.1 Chip Inventory

Click on **Chip Inventory** under the **Chips** heading; your lab group will be listed with all available chip types. Click on a chip type to view a detailed list of current transactions and a table of running totals (see Figure 2).

### Listing Chip Transactions for Flora and Blue Seaweed

[Chip Inventory Home](#)

#### Totals

| Acquired | Used | Traded or Sold | Borrowed(In) | Returned(Out) | Borrowed(Out) | Returned(In) | Current Number of Chips |
|----------|------|----------------|--------------|---------------|---------------|--------------|-------------------------|
| 0        | 9    | 0              | 0            | 0             | 0             | 0            | -9                      |

#### Individual Transactions

| Date       | Description              | Acquired | Used | Traded or Sold | Borrowed(In) | Returned(Out) | Borrowed(Out) | Returned(In) |
|------------|--------------------------|----------|------|----------------|--------------|---------------|---------------|--------------|
| 2006-09-05 | Hybridized on 2006-09-05 |          | 3    |                |              |               |               |              |
| 2006-08-29 | Hybridized on 2006-08-29 |          | 1    |                |              |               |               |              |
| 2006-08-29 | Hybridized on 2006-08-29 |          | 1    |                |              |               |               |              |
| 2006-08-28 | Hybridized on 2006-08-28 |          | 2    |                |              |               |               |              |
| 2006-08-28 | Hybridized on 2006-08-28 |          | 2    |                |              |               |               |              |

Figure 2 - Chip Inventory

## 3 Samples

### 3.1 Status of Submitted Samples

Under the heading **Samples**, click **Samples**. A list of all samples entered by your lab group will be displayed in a table showing the status of each individual sample (see Figure 2). You have the ability to **Edit** or **Destroy** the record of a particular sample.

#### Samples

[Submit New Samples](#)

| Date       | Short Sample Name | Sample Name    | Sample Group Name | Status     | Edit                 | Destroy                 |
|------------|-------------------|----------------|-------------------|------------|----------------------|-------------------------|
| 2006-09-05 | B-1               | Blue-1         | Blue              | hybridized | <a href="#">Edit</a> | <a href="#">Destroy</a> |
| 2006-09-05 | B-2               | Blue-2         | Blue              | hybridized | <a href="#">Edit</a> | <a href="#">Destroy</a> |
| 2006-09-05 | B-3               | Blue-3         | Blue              | hybridized | <a href="#">Edit</a> | <a href="#">Destroy</a> |
| 2006-09-05 | B-4               | Blue-4         | Blue              | submitted  | <a href="#">Edit</a> | <a href="#">Destroy</a> |
| 2006-09-05 | B-5               | Blue-5         | Blue              | submitted  | <a href="#">Edit</a> | <a href="#">Destroy</a> |
| 2006-09-05 | B-6               | Blue-6         | Blue              | submitted  | <a href="#">Edit</a> | <a href="#">Destroy</a> |
| 2006-08-28 | Blue_4            | Blue_Seaweed_4 | Blue              | hybridized | <a href="#">Edit</a> | <a href="#">Destroy</a> |
| 2006-08-28 | Blue_5            | Blue_Seaweed_5 | Blue              | hybridized | <a href="#">Edit</a> | <a href="#">Destroy</a> |
| 2006-08-28 | Blue_6            | Blue_Seaweed_6 | Blue              | hybridized | <a href="#">Edit</a> | <a href="#">Destroy</a> |

Figure 2 - Submitted Samples

### 3.2 Submitting New Samples

To submit new samples click on **Submit New Samples** at the top of the table (this can also be done by clicking **Submit New Samples** on the home page). Fill in the fields provided with the sample information (see Figure 3).

**Enter Samples**

Date Samples will be submitted  
2006 | September | 6

Number of Samples  
2

Lab Group  
Flora

Chip Type  
Blue Seaweed

**Wait until you've finished adding samples to this table before entering the sample names.**

| Date       | Short Name | Full Sample Name       | Sample Group Name | Organism | Lab Group | Chip Type    |
|------------|------------|------------------------|-------------------|----------|-----------|--------------|
| 2006-09-06 | seaweed_A  | treated_blue_seaweed_A | A                 | Seaweed  | Flora     | Blue Seaweed |
| 2006-09-06 | seaweed_B  | treated_blue_seaweed_B | B                 | Seaweed  | Flora     | Blue Seaweed |

[Clear Samples](#) | [Back to List of Samples](#)

Figure 3 – Submitting Samples

The fields of information requested are dependant on the site configurations determined by the administrator. Click on the **Add to Sample Table** button when completed. Repeat with remaining batches of samples.

Do not start filling out the **Sample Table** until all the samples to be submitted have been added to the table.

After the **Add to Sample Table** button is clicked information on each sample will be requested. Sample names cannot have symbols in them, such as + or /, or spaces, instead use a dash or an underscore. If samples are entered incorrectly an error message will pop up prompting you to make appropriate corrections.

Once entered, click **Create Sample Records**. The software will let you know that the records have been successfully created (see Figure 4).

Samples created successfully

#### Samples Recorded:

| Date       | Short Name | Full Sample Name       | Lab Group | Chip Type    |
|------------|------------|------------------------|-----------|--------------|
| 2006-09-06 | seaweed_A  | treated_blue_seaweed_A | Flora     | Blue Seaweed |
| 2006-09-06 | seaweed_B  | treated_blue_seaweed_B | Flora     | Blue Seaweed |

[Sample List](#)

#### Figure 4 – Entered Samples

The samples will now be listed in the **Sample List** with status ‘submitted’. They will also appear on the home page in the table under the heading **Samples Submitted for Hybridization**, until they have been selected for hybridization by the facility.

## 4 Exit SLIMarray

### 4.1 Log out

Click **Log Out** to exit SLIMarray and return to the login page.
